# Supplementary material for: Of microbes and mange: consistent changes in the skin microbiome of three canid species infected with Sarcoptes scabiei mites
Source: PubMed Central journal article supplement (PMC6796464; doi:10.1186/s13071-019-3724-0), 2019-10-16

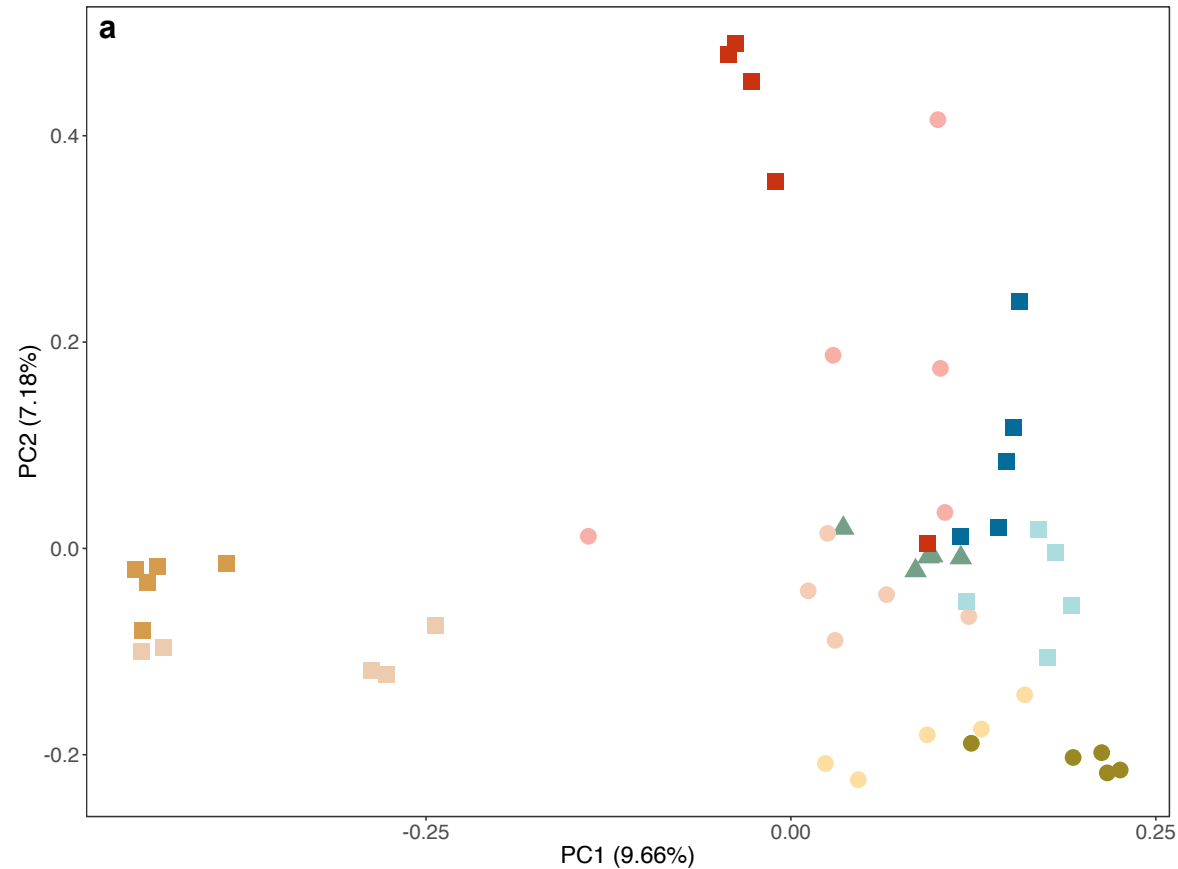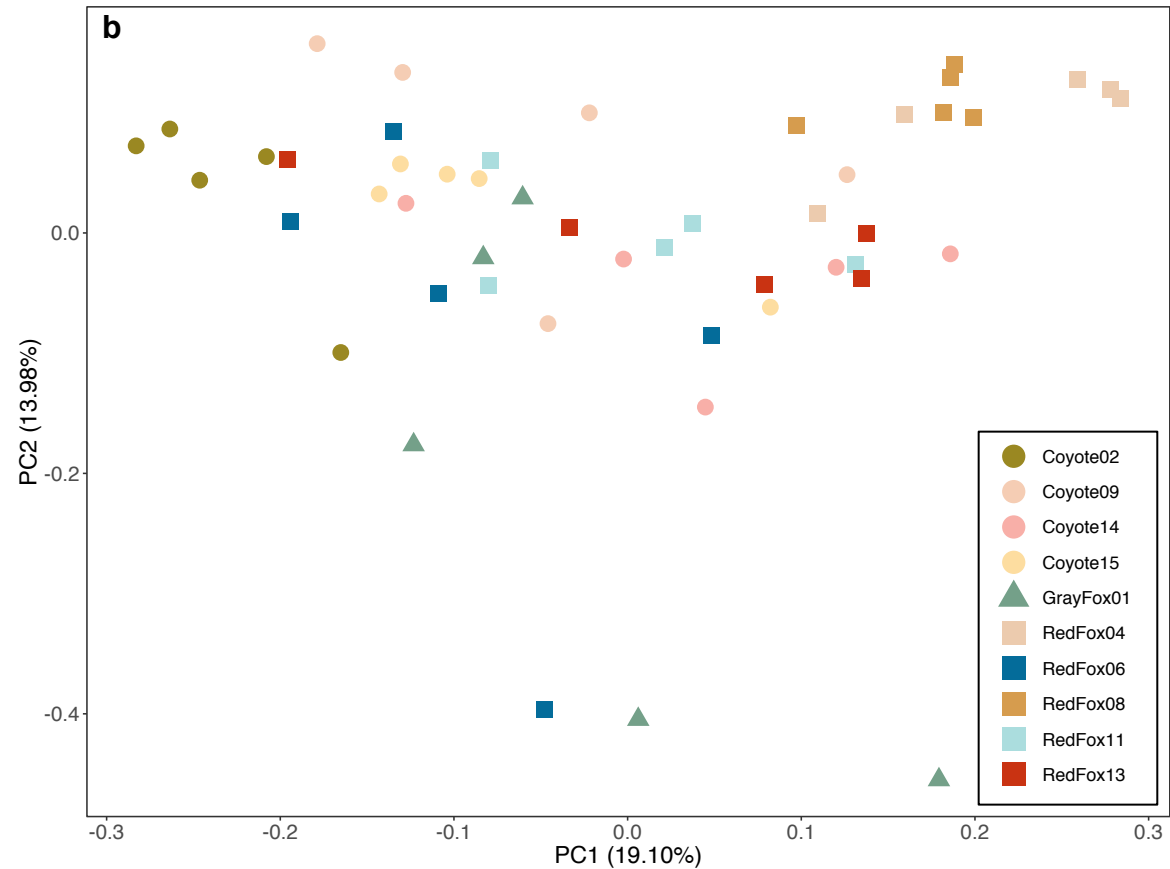

Supplement: 13071_2019_3724_MOESM2_ESM.pdf [file 13071_2019_3724_MOESM2_ESM.pdf]
